# Supplementary material for: Bowls, Vases and Goblets – The Microcrockery of Polymer and Nanocomposite Morphology Revealed by Two-Photon Optical Tomography
Source: Research Square preprint supplement (doi:10.21203/rs.3.rs-454748/v1), 2021-05-05
Supplement: Supplementary file 1 [file d09b6cc91d886cfc414795e5.pdf]

Supporting Information for:

## Bowls, Vases and Goblets – The Microcrockery of Polymer and Nanocomposite Morphology Revealed by Two-Photon Optical Tomography

Shu-Gui Yang<sup>1,2</sup>, Zhen-Zhen Wei<sup>2,3</sup>, Liliana Cseh<sup>4</sup>, Pantea Kazemi<sup>2</sup>, Xiang-bing Zeng<sup>2</sup>, Hui-Jie Xie<sup>5</sup>, Hina Saba<sup>5</sup>, Goran Ungar<sup>1,2\*</sup>

1. State Key Laboratory for Mechanical Behaviour of Materials, Shaanxi International Research Centre for Soft Matter, Xi'an Jiaotong University, Xi'an, 710049, P. R. China. Email: [g.ungar@xjtu.edu.cn](mailto:g.ungar@xjtu.edu.cn);
2. Department of Materials Science and Engineering, University of Sheffield, Sheffield S1 3JD, UK. [g.ungar@sheffield.ac.uk](mailto:g.ungar@sheffield.ac.uk)
3. College of Textile and Clothing Engineering, National Engineering Laboratory for Modern Silk, Soochow University, Suzhou 215123, China
4. Romanian Academy, Coriolan Dragulescu Institute of Chemistry, Timisoara 300223, Romania
5. Department of Physics, Zhejiang Sci-Tech University, 310018, Hangzhou, China

**Figure S1a** shows a transmission electron microscope (TEM) image of the 200 nm diameter silica nanoparticles used. **Figure S1b** shows that a NR molecule contained a siloxane head group is chemically bound to the NP. **Figure S1c** is the histogram of NP size measured from TEM images. It shows that the NPs are highly monodisperse.

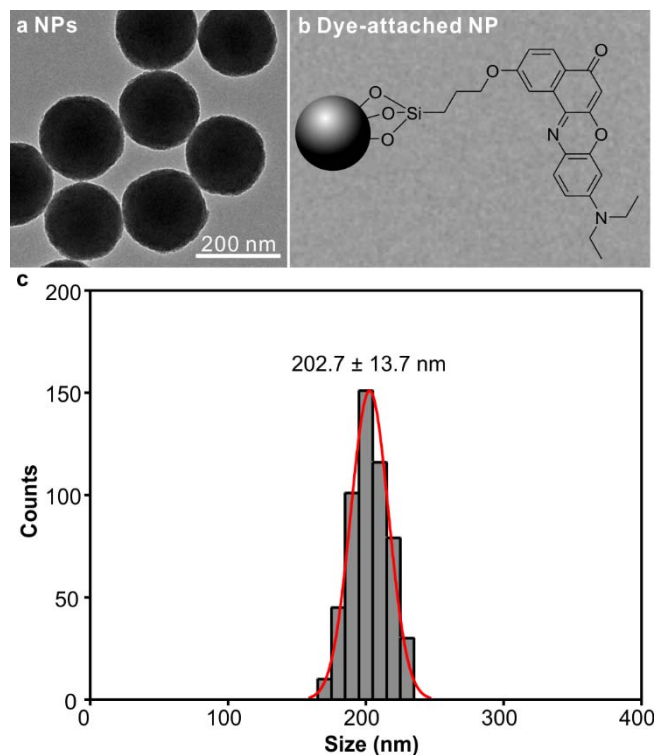

**Fig. S1** **a**, TEM image of SiO<sub>2</sub> NPs of 200 nm diameter. **b**, Siloxane-modified NR molecule chemically bonded to a SiO<sub>2</sub> NP. **c**, Size distribution of the NPs.

To find the suitable immersion time for labelling iPP sample with NR, different immersion times were explored. **Figures S2a** and **S2b** show the examples of under- (14 hours) and over-immersion (65 hours).

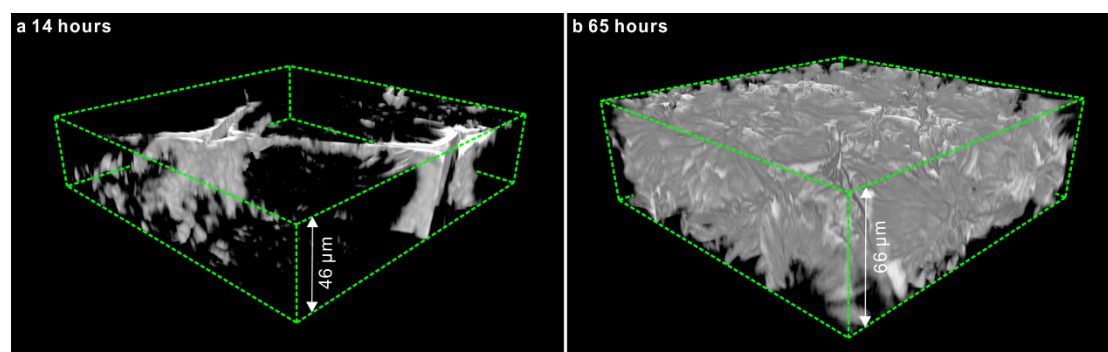

**Fig. S2** “Porous” 3D rendering of iPP sample labelled by infiltration of the NR solution, **a**, under-immersion 14 hours, **b**, over-immersion 65 hours.

**Figure S3** shows that, as in PLA, the aspect ratio of iPP spherulites also increases with the proximity of the substrate, but to a lesser extent.

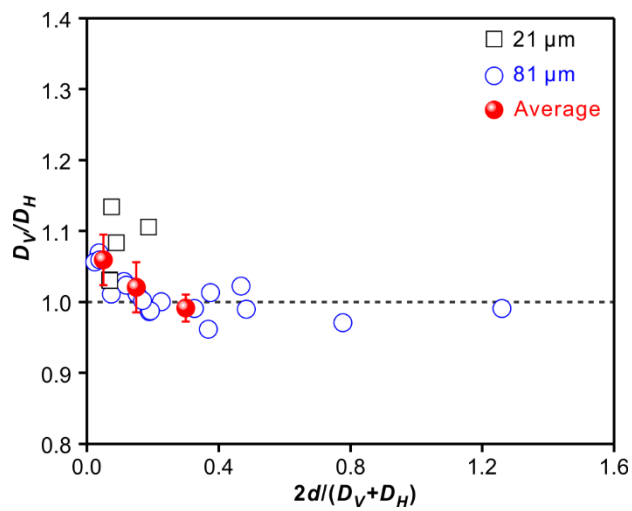

**Fig. S3** Aspect ratio of growth-arrested iPP spherulites as a function of relative distance from the glass surface (*cf.* Fig 6e).
